# Supplementary material for: Supramolecular self-assembly and photophysical properties of pillar[5]arene-stabilized CdTe quantum dots mediated by viologens
Source: Royal Society of Chemistry journal article supplement (doi:10.1039/c3ra40436f), 2013-01-01
Supplement: c3ra40436f.pdf [file c3ra40436f.pdf]

## Electronic Supplementary Information

*for*

### **Supramolecular self-assembly and photophysical properties of pillar[5]arene-stabilized CdTe quantum dots mediated by viologens**

*Dai-Xiong Chen, Yu-Long Sun, Yi Zhang, Jun-Yan Cui, Fang-Zhong Shen and Ying-Wei Yang\**

*State Key Laboratory of Supramolecular Structure and Materials, College of Chemistry,  
Jilin University, 2699 Qianjin Street, Changchun 130012, P. R. China  
Corresponding Author, \*Email: ywyang@jlu.edu.cn*

## Contents

|                                                                                     |    |
|-------------------------------------------------------------------------------------|----|
| 1. Materials and Methods                                                            | S2 |
| 2. Preparation of MPA@QDs and CP[5]A@QDs                                            | S2 |
| 3. The Influence of Viologen III on the Zeta Potentials of MPA@QDs and CP[5]A@QD.   | S5 |
| 4. Visualization of CP[5]A@QD Solutions in Different Conditions                     | S5 |
| 5. The <sup>1</sup> H NMR Spectra of Host-Guest Interaction of CP[5]A and Viologens | S6 |

## 1. Materials and Methods

All solvents used in this study were reagent grade and purchased from commercial sources. Deionized H<sub>2</sub>O was used in all experiments unless otherwise noted. Transmission electron microscopy (TEM) images were collected on a Hitachi H-800 instrument, where the accelerating voltage was 200 kV. Fourier transform infrared (FT-IR) spectra were recorded on a Bruker Vertex 80V spectrometer. Zeta potential measurements were tested on a Zetasizer Nano 9300 instrument. UV-*vis* spectroscopy and fluorescence spectroscopy were performed on a Shimadzu UV-2550 spectrophotometer and a Shimadzu RF-5301PC spectrophotometer, respectively. NMR spectra were recorded on a Bruker 500 MHz NMR spectrometer. CP[5]A, MV and bridged bis(MV)s were synthesized according to our previous report<sup>S1</sup>.

## 2. Preparation of MPA@QDs and CP[5]A@QDs

### 2.1 Synthesis of CdTe QDs stabilized with MPA

MPA-stabilized CdTe QDs was synthesized according to the literature report<sup>S2</sup>. The solutions of CdCl<sub>2</sub> and NaHTe precursor were refluxed under N<sub>2</sub> protection to give CdTe QDs. In a typical experiment, CdCl<sub>2</sub> (35 mg) and 3-mercaptopropionic acid (MPA, 39 mg) were added into deionized H<sub>2</sub>O (150 mL). Then, the pH of the mixture was adjusted to 9 using sodium hydroxide solution (1 M). N<sub>2</sub> was bubbled through the reaction mixture for about 30 min. Subsequently, the NaHTe solution (0.33 M) was rapid injected into the mixture, and the ratio of Cd<sup>2+</sup>/MPA/Te<sup>2-</sup> was 1/2.4/0.2. Then, the mixture was heated to 90 °C under a N<sub>2</sub> atmosphere. After 4 h, CdTe QDs were obtained, showing orange fluorescent emission under UV-light irradiation. The obtained CdTe QDs were further purified by precipitation-redispersion cycle to remove the excess of MPA. Finally, the precipitate of CdTe QDs (MPA@QDs) was dispersed into deionized H<sub>2</sub>O for further experiment.

### 2.2 Sonochemical preparation of carboxylatopillar[5]arene-stabilized CdTe QDs (CP[5]A@QDs)

CP[5]A@QDs were prepared *via* a sonochemical method. An aqueous solution of CP[5]A (50 mg) was added into a purified CdTe solution (10 mL), and the pH of the resulting mixture was adjusted to 14 with NaOH solution (1 M). Then, the mixture was placed in a high-intensity ultrasound bath (150 W, 40 KHz) for about 60 min. Then, Me<sub>2</sub>CO (5 mL) was poured into the reaction mixture. Subsequently, excess of unreacted CP[5]As were removed by centrifugation and washing of the crude product with Me<sub>2</sub>CO to give pure CP[5]A@QDs, which were further dispersed in deionized H<sub>2</sub>O (30 mL) for future experiments.

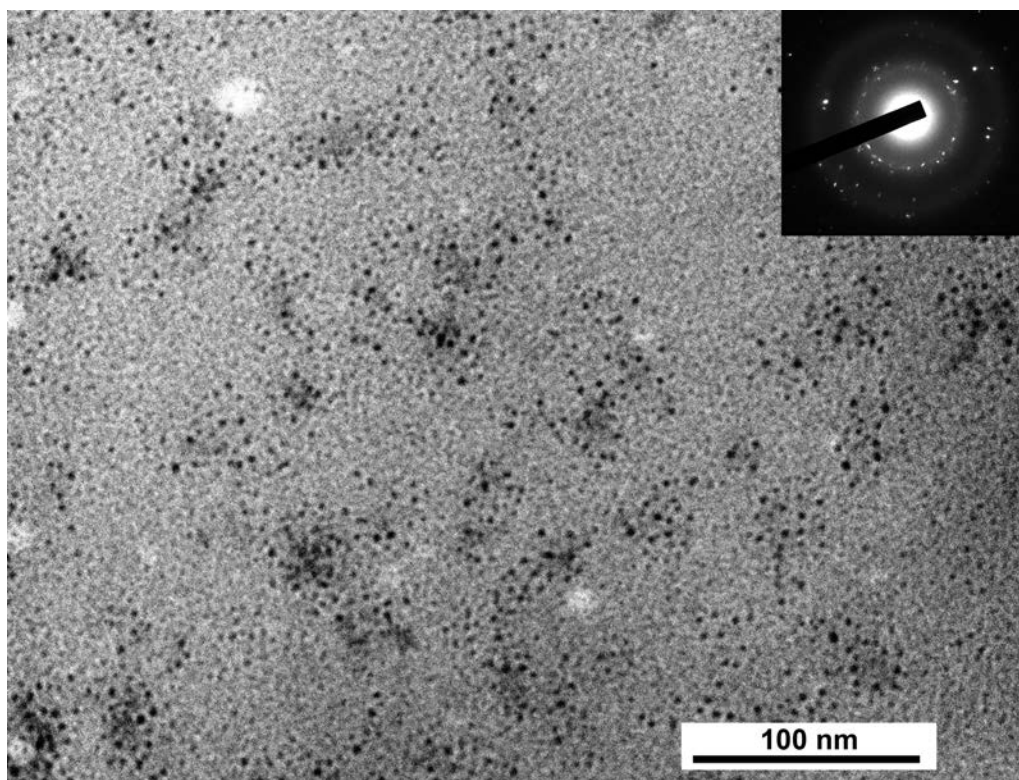

**Figure S1.** TEM image and selected area electron diffraction (SAED) pattern of CP[5]A@QDs.

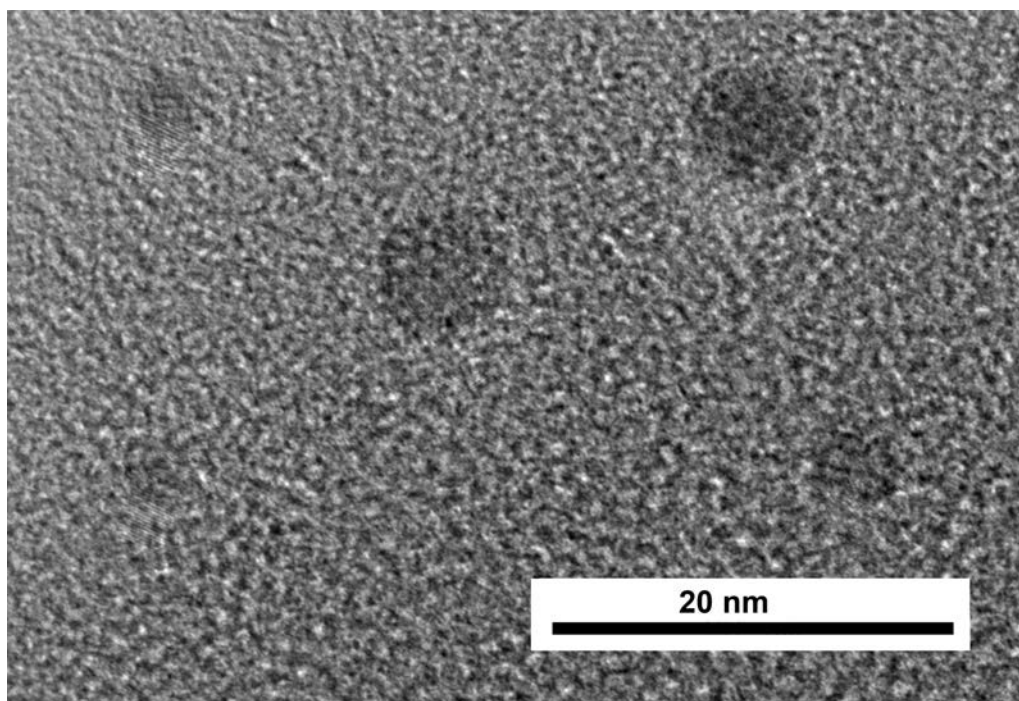

**Figure S2.** HR-TEM image of CP[5]A@QDs.

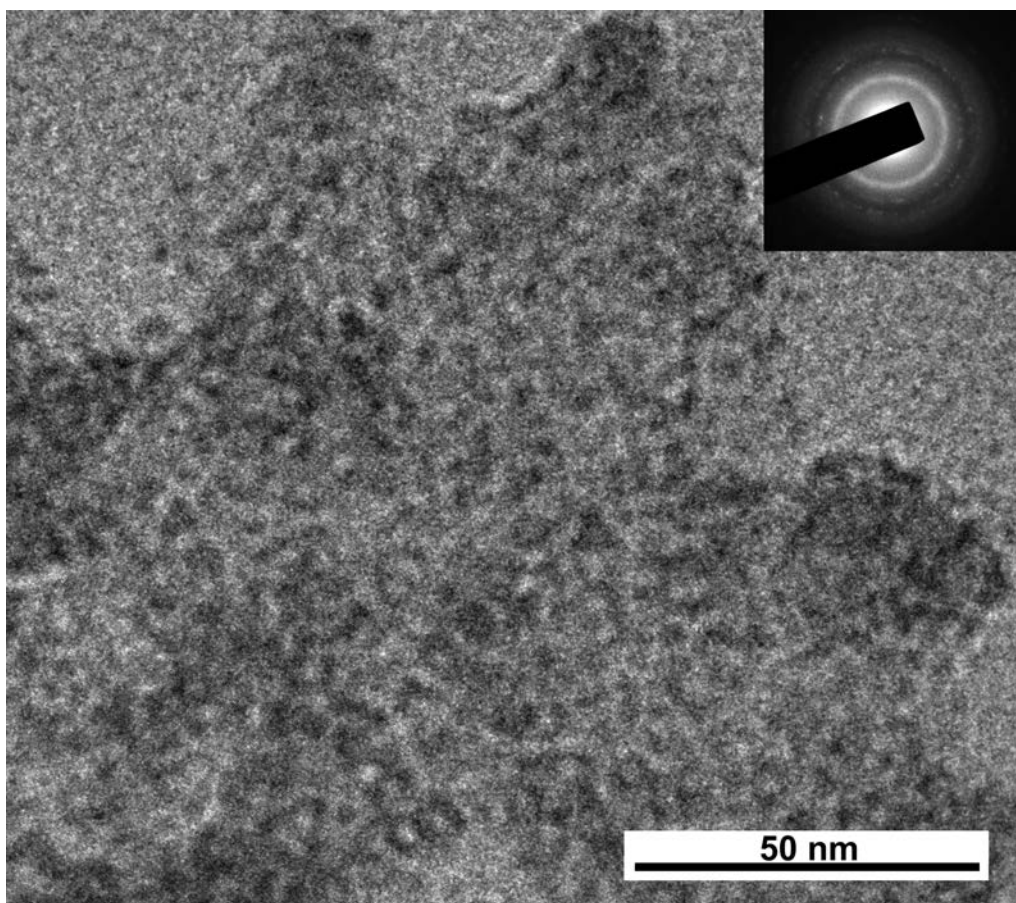

**Figure S3.** TEM image and selected area electron diffraction (SAED) pattern of CP[5]A@QD oligomer.

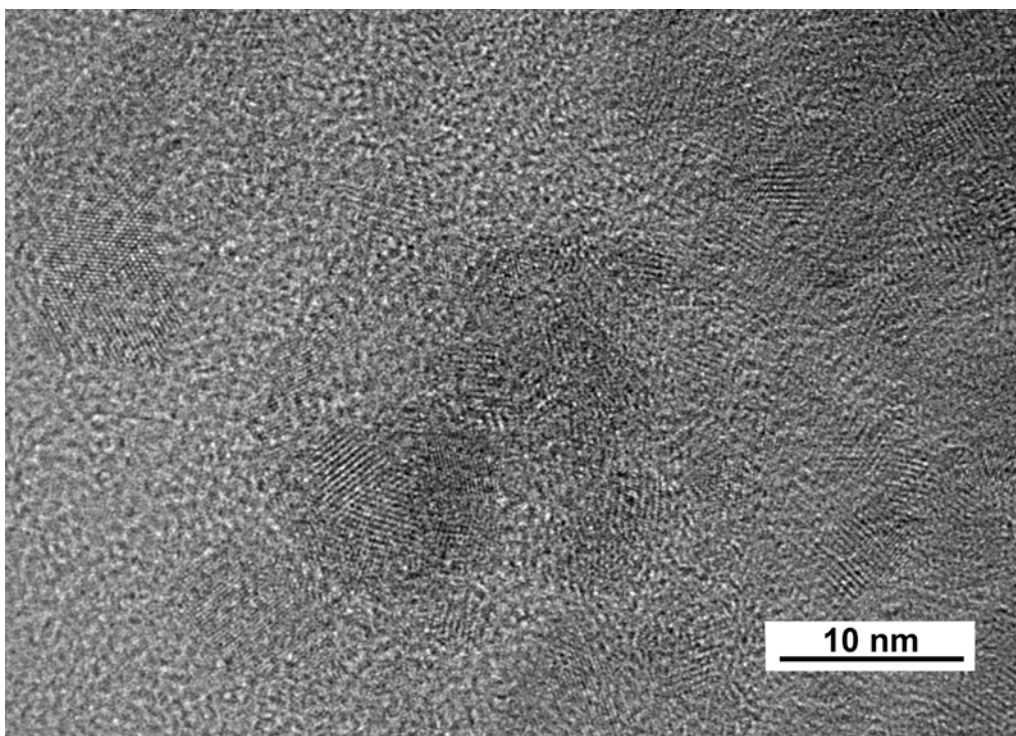

**Figure S4.** HR-TEM image of CP[5]A@QDs oligomer.

### 3 The Influence of Viologen III on the Zeta Potentials of MPA@QDs and CP[5]A@QD

**Table S1.** Zeta potentials of MPA@QDs and CP[5]A@QDs before and after the addition of bridged bis(MV)s solution ( $1.0 \times 10^{-5}$  M).

| QDs        | Amount of Bridged Bis(MV)s Solution Added | Zeta potential (mV) |
|------------|-------------------------------------------|---------------------|
| MPA@QDs    | 0 $\mu$ L                                 | -40.7               |
| MPA@QDs    | 2 $\mu$ L                                 | -21.0               |
| MPA@QDs    | 6 $\mu$ L                                 | -3.8                |
| CP[5]A@QDs | 0 $\mu$ L                                 | -52.6               |
| CP[5]A@QDs | 2 $\mu$ L                                 | -55.1               |
| CP[5]A@QDs | 6 $\mu$ L                                 | -55.5               |
| CP[5]A@QDs | 10 $\mu$ L                                | -55.9               |
| CP[5]A@QDs | 14 $\mu$ L                                | -56.6               |
| CP[5]A@QDs | 20 $\mu$ L                                | -56.8               |
| CP[5]A@QDs | 25 $\mu$ L                                | -63.3               |
| CP[5]A@QDs | 35 $\mu$ L                                | -61.2               |
| CP[5]A@QDs | 45 $\mu$ L                                | -58.4               |

### 4 Visualization of CP[5]A@QD Solutions in Different Conditions

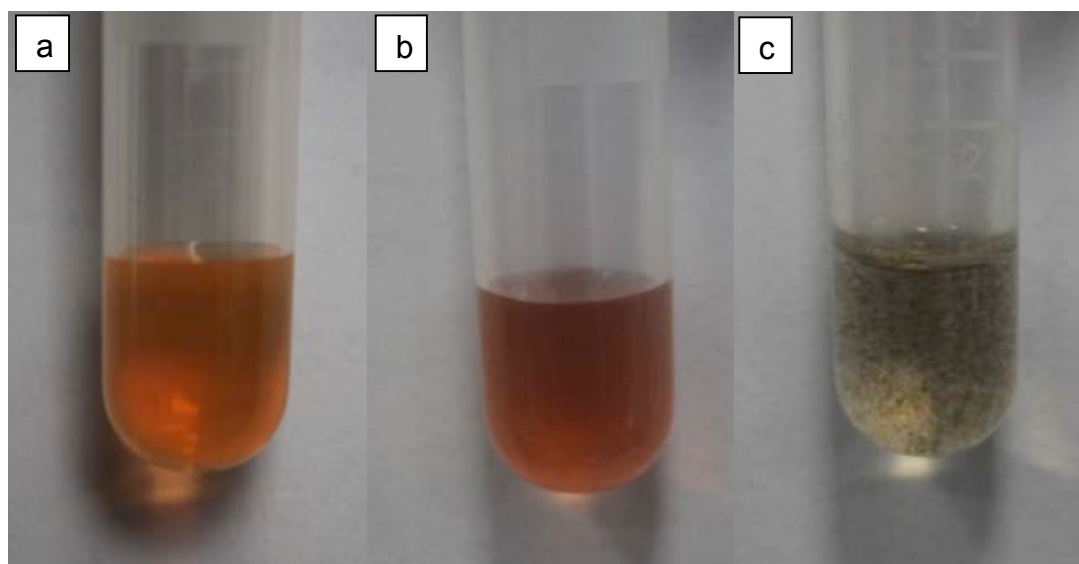

**Figure S5.** Aqueous solutions of (a) CP[5]A@QDs; (b) CP[5]A@QDs upon the addition of a small amount of bridged bis(MV)s; (c) CP[5]A@QDs upon the addition of excess of bridged bis(MV)s.

## 5 The $^1\text{H}$ NMR Spectra of Host-Guest Interaction of CP[5]A and Viologens<sup>S3,S4</sup>

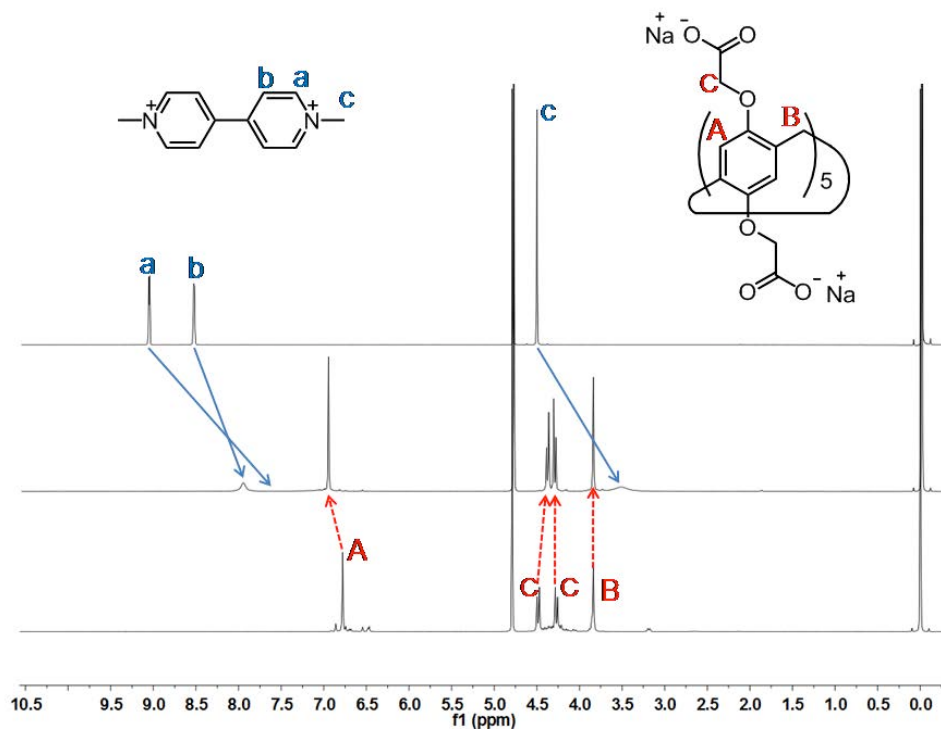

**Figure S6.**  $^1\text{H}$  NMR spectra of host-guest interaction of CP[5]A and MV.

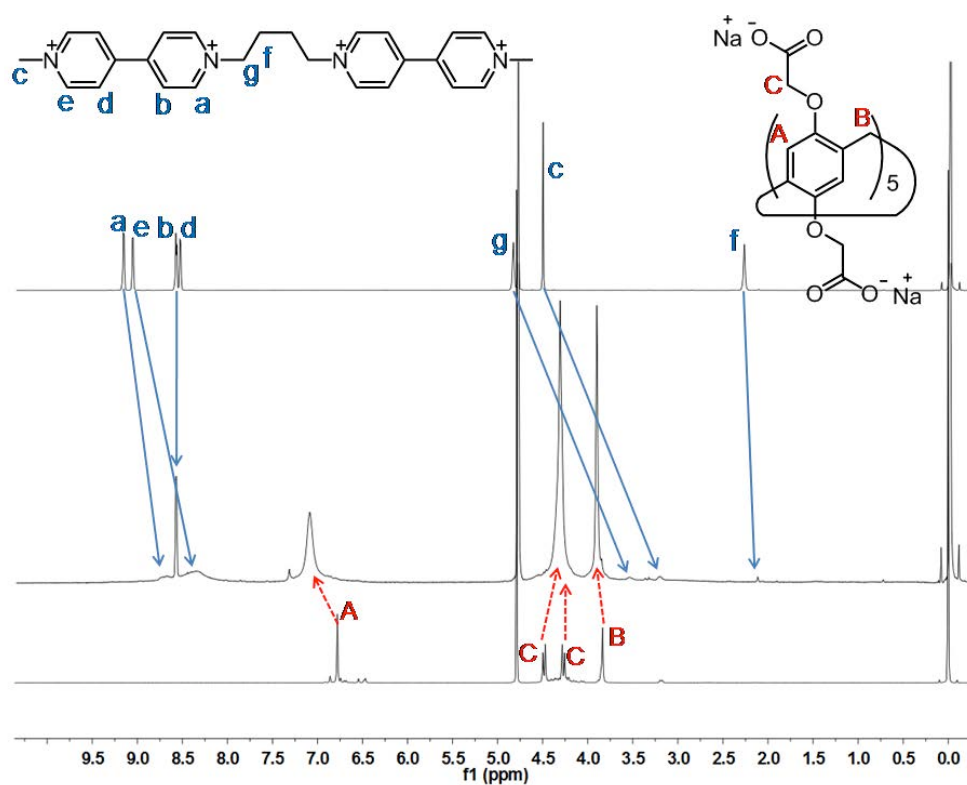

**Figure S7.**  $^1\text{H}$  NMR spectra of host-guest interaction of CP[5]A and bridged bis(MV)s.

## References

- S1. H. Li, D.-X. Chen, Y.-L. Sun, Y. B. Zheng, L.-L. Tan, P. S. Weiss and Y.-W. Yang, *J. Am. Chem. Soc.* 2013, **135**, 1570–1576.
- S2. H. Zhang, D. Wang, B. Yang and H. Möhwald, *J. Am. Chem. Soc.*, 2006, **128**, 10171–10180.
- S3. T. Ogoshi, M. Hashizume, T.-a. Yamagishi and Y. Nakamoto, *Chem. Commun.*, 2010, **46**, 3708–3710.
- S4. C. Li, Q. Xu, J. Li, F. Yao and X. Jia, *Org. Biomol. Chem.*, 2010, **8**, 1568–1576.
